# Supplementary material for: Therapeutic Monoclonal Antibodies against Cancer: Present and Future
Source: MDPI journal article supplement (doi:10.3390/cells12242837), 2023-12-14
Supplement: s1 [file s1]

**Table S1.** Description of commercially available therapeutic antibodies either approved or in late review stages and their molecular targets.

| International Non-Proprietary Name | Indication First approved | Target        | Heavy/light Chains/Specificity | First global approval (country, year) or in review | Conjugation/Pay load                        | Fc Modifications                                      |
|------------------------------------|---------------------------|---------------|--------------------------------|----------------------------------------------------|---------------------------------------------|-------------------------------------------------------|
| Atezolizumab                       | bladder cancer            | PD-L12        | IgG1/k/Mono                    | US, 2016                                           |                                             | Remove Fc effector functions                          |
| Durvalumab                         | bladder cancer            | PD-L12        | IgG1/k/Mono                    | US, 2017                                           |                                             | Remove Fc effector functions                          |
| [fam-] trastuzumab deruxtecan-nxki | breast cancer             | HER2          | IgG1/k/Mono                    | US, 2019                                           | ADC <sup>3</sup> : DXd <sup>5</sup>         |                                                       |
| Ado-trastuzumab emtansine          | breast cancer             | HER2          | IgG1/k/Mono                    | US, 2013                                           | ADC <sup>3</sup> : DM1 <sup>6</sup>         |                                                       |
| Margetuximab-cmkb                  | breast cancer             | HER2          | IgG1/k/Mono                    | US, 2020                                           |                                             | Improved FcγRIIIa binding <sup>15</sup> Improved ADCC |
| Cipterbin <sup>a</sup>             | breast cancer             | HER2          | IgG1/n.a. <sup>1</sup> /Mono   | China, 2020                                        |                                             | Enhanced ADCC/ADCP <sup>16</sup>                      |
| Pertuzumab                         | breast cancer             | HER2          | IgG1/k/Mono                    | US, 2012                                           |                                             |                                                       |
| Trastuzumab                        | breast cancer             | HER2          | IgG1/k/Mono                    | US, 1998                                           |                                             |                                                       |
| Trastuzumab duocarmazine           | breast cancer             | HER2          | IgG1/k/Mono                    | in review                                          | ADC <sup>3</sup> : Duocarmycin <sup>7</sup> |                                                       |
| Trastuzumab botidotin              | breast cancer             | HER2          | IgG1/k/Mono                    | in review                                          | ADC <sup>3</sup> : Duostatin-5 <sup>8</sup> |                                                       |
| Sacituzumab govitecan-hziy         | breast cancer: TNBC       | TROP-2        | IgG1/k/Mono                    | US, 2020                                           | ADC <sup>3</sup> : SN38 <sup>9</sup>        |                                                       |
| Enlonstobart                       | cervical cancer           | PD-12         | IgG4/k/Mono                    | in review                                          |                                             |                                                       |
| Cadonilimab                        | cervical cancer           | PD-12, CTLA42 | IgG1/k/Bi                      | China, 2022                                        |                                             | Reduced Fc effector function                          |
| Socazolimab                        | cervical cancer           | PD-L12        | IgG1/l2/Mono                   | in review                                          |                                             |                                                       |
| Tisotumab vedotin-tftv             | cervical cancer           | Tissue factor | IgG1/k/Mono                    | US, 2021                                           | ADC <sup>3</sup> : MMAE <sup>10</sup>       |                                                       |
| Omburtamab                         | CNS, neuroblastoma        | B7-H3         | mIgG1/k/Mono                   | in review                                          | RIC <sup>4</sup> : Iodine-131               |                                                       |
| Dinutuximab                        | CNS, neuroblastoma        | GD2           | IgG1/k/Mono                    | US, 2015                                           |                                             |                                                       |
| Naxitamab-gqgk                     | CNS, neuroblastoma        | GD2           | IgG1/k/Mono                    | US, 2020                                           |                                             |                                                       |
| Cetuximab                          | colon/colorectal cancer   | EGFR          | IgG1/k/Mono                    | Switzerland, 2003                                  |                                             |                                                       |
| Panitumumab                        | colon/colorectal cancer   | EGFR          | IgG2/k/Mono                    | US, 2006                                           |                                             |                                                       |
| Edrecolomab                        | colon/colorectal cancer   | EpCAM         | mIgG2a/k/Mono                  | Germany, 1995                                      |                                             |                                                       |
| Bevacizumab                        | colon/colorectal cancer   | VEGF-A        | IgG1/k/Mono                    | US, 2004                                           |                                             |                                                       |
| Dostarlimab                        | endometrial cancer        | PD-12         | IgG4/k/Mono                    | EU, 2021                                           |                                             | Hinge stabilizing                                     |
| Zolbetuximab                       | esophageal/gastric cancer | Claudin-18.2  | IgG1/k/Mono                    | in review                                          |                                             |                                                       |
| Disitamab vedotin                  | gastric cancer            | HER2          | IgG1/k/Mono                    | China, 2021                                        | ADC <sup>3</sup> : MMAE <sup>10</sup>       |                                                       |
| Ramucirumab                        | gastric cancer            | VEGFR2        | IgG1/k/Mono                    | US, 2014                                           |                                             |                                                       |

|                               |                                       |              |                                                        |              |                                                        |                   |
|-------------------------------|---------------------------------------|--------------|--------------------------------------------------------|--------------|--------------------------------------------------------|-------------------|
| Cetuximab<br>saratolacan      | head & neck<br>cancer                 | EGFR         | IgG1/k/Mono                                            | Japan, 2020  | Photoimmunoth<br>erapy IRDye®<br>700DX                 |                   |
| Nimotuzumab                   | head & neck<br>cancer                 | EGFR         | IgG1/k/Mono                                            | Cuba, 2002   |                                                        |                   |
| Emapalumab-lzsg               | hemophagocytic<br>lymphohistiocytosis | IFN $\gamma$ | IgG1/l/Mono                                            | US, 2018     |                                                        |                   |
| Blinatumomab                  | leukemia: ALL                         | CD19, CD3    | Tandem scFv/n.a./Bi                                    | US, 2014     |                                                        |                   |
| Inotuzumab<br>ozogamicin      | leukemia: ALL                         | CD22         | IgG4/k/Mono                                            | US, 2017     | ADC <sup>3</sup> :<br>Calicheamicin <sup>11</sup>      | Hinge stabilizing |
| Gemtuzumab<br>ozogamicin      | leukemia: AML                         | CD33         | IgG4/k/Mono                                            | US, 2000     | ADC <sup>3</sup> :<br>Calicheamicin <sup>11</sup>      | Hinge stabilizing |
| Obinutuzumab                  | leukemia: CLL                         | CD20         | IgG1/k/Mono                                            | US, 2013     | Improved Fc $\gamma$ RIIIa<br>binding/Improved<br>ADCC |                   |
| Ofatumumab                    | leukemia: CLL                         | CD20         | IgG1/k/Mono                                            | US, 2009     |                                                        |                   |
| Alemtuzumab                   | leukemia: CML                         | CD52         | IgG1/k/Mono                                            | US, 2001     |                                                        |                   |
| Moxetumomab<br>pasudotox-tdfk | leukemia: HCL                         | CD22         | dsFv fused with<br>PE38 exotoxin//Mono                 | US, 2018     | Immunoconjugat<br>ePE38                                |                   |
| Tremelimumab                  | liver cancer                          | CTLA-42      | IgG2/k/Mono                                            | US, 2022     |                                                        |                   |
| Ivonescimab                   | lung cancer                           | PD-12, VEGF  | IgG1/k/Bi                                              | in review    | Removed Fc effector<br>functions                       |                   |
| Necitumumab                   | lung: non-small<br>cell               | EGFR         | IgG1/k/Mono                                            | US, 2015     |                                                        |                   |
| Racotumomab                   | lung: non-small<br>cell               | GM3          | mIgG1/k/Mono                                           | Cuba, 2013   |                                                        |                   |
| Sintilimab                    | lung: non-small<br>cell               | PD-12        | IgG4/k/Mono                                            | China, 2018  | Hinge stabilizing                                      |                   |
| Sugemalimab                   | lung: non-small<br>cell               | PD-L12       | IgG4/l/Mono                                            | China, 2021  | Hinge stabilization                                    |                   |
| Adebrelimab                   | lung: small cell                      | PD-L12       | IgG4/k/Mono                                            | China, 2023  | Hinge stabilization;<br>abrogated effector<br>function |                   |
| Benmelstobart                 | lung: small cell                      | PD-L12       | IgG1/k/Mono                                            | in review    | Removed Fc effector<br>functions                       |                   |
| Loncastuximab<br>tesirine     | lymphoma: B cell                      | CD19         | IgG1/k/Mono                                            | US, 2021     | ADC <sup>3</sup> : SG3199 <sup>12</sup>                |                   |
| Tafasitamab-cxix              | lymphoma: B cell                      | CD19         | IgG1/2<br>hybrid/k/Mono                                | US, 2020     | Improved Fc $\gamma$ RIIIa<br>binding/Improved<br>ADCC |                   |
| Zuberitamab                   | lymphoma: B cell                      | CD20         | IgG1/k/Mono                                            | China, 2023  |                                                        |                   |
| Epcoritamab                   | lymphoma: B cell                      | CD20, CD3    | IgG1; Hetero H/l,<br>k/Bi                              | US, 2023     | Chain pairing,<br>Reduced Fc effector<br>function      |                   |
| Odronextamab                  | lymphoma: B cell                      | CD20, CD3    | IgG4 Hetero H,<br>cL/k/Bi                              | in review    | Fc-silencing and<br>hinge-stabilization                |                   |
| Glofitamab                    | lymphoma: B cell                      | CD20, CD3e   | IgG1; CrossMab;<br>Fab-Fc(G1) x Fab-<br>Fab-Fc/l, k/Bi | Canada, 2023 | Chain pairing,<br>Reduced Fc effector<br>function      |                   |
| Polatuzumab<br>vedotin-piiq   | lymphoma: B cell                      | CD79b        | IgG1/k/Mono                                            | US, 2019     | ADC <sup>3</sup> : MMAE <sup>10</sup>                  |                   |
| Mosunetuzumab                 | lymphoma:<br>Follicular               | CD20, CD3    | IgG1; Hetero H, HL<br>assembly/k/Bi                    | EU, 2022     | Improved Fc $\gamma$ RIIIa<br>binding/Improved<br>ADCC |                   |

|                           |                                              |            |                                      |              |                                       |                                                                                         |
|---------------------------|----------------------------------------------|------------|--------------------------------------|--------------|---------------------------------------|-----------------------------------------------------------------------------------------|
| Brentuximab vedotin       | lymphoma: Hodgkin's                          | CD30       | IgG1/k/Mono                          | US, 2011     | ADC <sup>3</sup> : MMAE <sup>10</sup> |                                                                                         |
| Camrelizumab              | lymphoma: Hodgkin's                          | PD-12      | IgG4/k/Mono                          | China, 2019  |                                       | Hinge stabilization                                                                     |
| Zimberelimab              | lymphoma: Hodgkin's                          | PD-12      | IgG4/l/Mono                          | China, 2021  |                                       | Hinge stabilization                                                                     |
| Ibritumomab tiuxetan      | lymphoma: non-Hodgkin's                      | CD20       | mIgG1/k/Mono                         | US, 2002     | RIC4: Yttrium-90                      |                                                                                         |
| Ripertamab                | lymphoma: non-Hodgkin's                      | CD20       | IgG1/k/Mono                          | China, 2022  |                                       |                                                                                         |
| Rituximab                 | lymphoma: non-Hodgkin's                      | CD20       | IgG1/k/Mono                          | US, 1997     |                                       |                                                                                         |
| Tositumomab-I131          | lymphoma: non-Hodgkin's                      | CD20       | mIgG2a/l/Mono                        | US, 2003     | RIC4: Iodine-131                      |                                                                                         |
| Catumaxomab               | malignant ascites                            | EPCAM, CD3 | mIgG2a/k and rIgG2b/λ Hybrid/k, l/Bi | EU, 2009     |                                       |                                                                                         |
| Ipilimumab                | melanoma                                     | CTLA-42    | IgG1/k/Mono                          | US, 2011     |                                       |                                                                                         |
| Tebentafusp               | melanoma                                     | gp100, CD3 | scFv fused with a TCR/n.a./Bi        | US, 2022     | Immunoconjugate                       |                                                                                         |
| Relatlimab                | melanoma                                     | LAG-3      | IgG4/k/Mono                          | US, 2022     |                                       | Hinge stabilizing                                                                       |
| Pembrolizumab             | melanoma                                     | PD-12      | IgG4/k/Mono                          | US, 2014     |                                       | Hinge stabilizing                                                                       |
| Prolgolimab               | melanoma                                     | PD-12      | IgG1/V-l, C-k/Mono                   | Russia, 2020 |                                       | Reduced Fc effector function                                                            |
| Nivolumab                 | melanoma/lung: non-small cell                | PD-12      | IgG4/k/Mono                          | US, 2014     |                                       | Hinge stabilizing                                                                       |
| Amivantamab               | lung: non-small cell-EGFRmut                 | EGFR, cMET | IgG1/k/Bi                            | US, 2021     |                                       | Improved FcγRIIIa binding & ADCC; Controlled Fab arm exchange for bispecific generation |
| Retifanlimab              | merkel cell carcinoma                        | PD-12      | IgG4/k/Mono                          | US, 2023     |                                       | Hinge stabilizing                                                                       |
| Avelumab                  | merkel cell carcinoma                        | PD-L12     | IgG1/l/Mono                          | US, 2017     |                                       |                                                                                         |
| Pucotenlimab              | microsatellite instability-high solid tumors | PD-12      | IgG4/k/Mono                          | China, 2022  |                                       | Hinge stabilzation, half-life extension                                                 |
| Serplulimab               | microsatellite instability-high solid tumors | PD-12      | IgG4/k/Mono                          | China, 2022  |                                       | Hinge stabilization                                                                     |
| Envafohimab               | microsatellite instability-high solid tumors | PD-L12     | VHH-Fc (Fc IgG1)//Mono               | China, 2021  |                                       | Reduced Fc effector function (ADCC/ADCP)                                                |
| Belantamab mafodotin-blmf | Multiple Myeloma                             | BCMA       | IgG1/k/Mono                          | US, 2020     | ADC <sup>3</sup> : MMAF <sup>13</sup> | Improved FcγRIIIa binding/Improved ADCC                                                 |
| Elranatamab               | Multiple Myeloma                             | BCMA, CD3  | IgG2/k/Bi                            | US, 2023     |                                       | Strop Fab-arm exchange method                                                           |
| Teclistamab               | Multiple Myeloma                             | BCMA, CD3  | IgG4; Hetero H, HL exchanged/l/Bi    | EU, 2022     |                                       | Hinge-stabilizing (S228P) and Fc-silencing (F234A, L235A)                               |
| Daratumumab               | Multiple Myeloma                             | CD38       | IgG1/k/Mono                          | US, 2015     |                                       |                                                                                         |

|                           |                                     |                |                |             |                                                                         |
|---------------------------|-------------------------------------|----------------|----------------|-------------|-------------------------------------------------------------------------|
| Isatuximab-irfc           | Multiple Myeloma                    | CD38           | IgG1/k/Mono    | US, 2020    |                                                                         |
| Talquetamab-tgvs          | Multiple Myeloma                    | GPCR5D, CD3    | IgG4/l, k/Bi   | US, 2023    | Hinge-stabilization (S228P), Reduced Fc effector function (F234A-L235A) |
| Elotuzumab                | Multiple Myeloma                    | SLAMF7         | IgG1/k/Mono    | US, 2015    |                                                                         |
| Penpulimab                | nasopharyngeal carcinoma            | PD-12          | IgG1/n.a./Mono | China, 2021 | Reduced Fc effector functions                                           |
| Toripalimab               | nasopharyngeal carcinoma            | PD-12          | IgG4/k/Mono    | China, 2018 | Hinge stabilizing                                                       |
| Tagitanlimab              | nasopharyngeal carcinoma            | PD-L12         | IgG1/k/Mono    | in review   | Reduced Fc effector function                                            |
| Mirvetuximab soravtansine | ovarian cancer                      | FR $\alpha$    | IgG1/k/Mono    | US, 2022    | ADC <sup>3</sup> ; DM4 <sup>14</sup>                                    |
| Olaratumab                | sarcoma                             | PDGFR $\alpha$ | IgG1/k/Mono    | US, 2016    |                                                                         |
| Mogamulizumab-kpkc        | Sézary syndrome                     | CCR4           | IgG1/k/Mono    | Japan, 2012 | Improved Fc $\gamma$ RIIIa binding/Improved ADCC                        |
| Cosibelimab               | squamous cell carcinoma             | PD-L12         | IgG1/l/Mono    | in review   |                                                                         |
| Cemiplimab-rwlc           | squamous cell carcinoma: cutaneous  | PD-12          | IgG4/k/Mono    | US, 2018    | Hinge stabilizing                                                       |
| Tislelizumab              | squamous cell carcinoma: esophageal | PD-12          | IgG4/k/Mono    | China, 2019 | Hinge stabilizing; Abrogated Fc $\gamma$ Rs binding                     |
| Enfortumab vedotin-ejfv   | urothelial                          | Nectin-4       | IgG1/k/Mono    | US, 2019    | ADC <sup>3</sup> ; MMAE <sup>10</sup>                                   |

(a) No INN

(1) n.a. indicates that the data is not available

(2) antibodies targeting immune checkpoint molecules that can be used for the treatment of many tumor types, to switch the host's immune response to generate an anti-tumoral response

(3) ADC or antibody-drug conjugate

(4) RIC is a radioactive isotope conjugated antibody

(5) DXd is an inhibitor of topoisomerase I

(6) DM1 is an inhibitor of tubulin polymerization

(7) Duocarmycin is a DNA minor-groove-binding alkylating agent

(8) Duostatin-5 is a Tubulin inhibitor

(9) SN38 is a topoisomerase I inhibitor

(10) MMAE or Monomethyl Auristatin E is a tubulin polymerization inhibitor

(11) Calicheamicin is DNA-binding and induces double-chain breaks

(12) SG3199 is a cytotoxic DNA minor groove interstrand crosslinking pyrrolobenzodiazepine (PBD) dimer a potent cytotoxic agent for cells

(13) Monomethyl Auristatin F or MMAF is a tubulin polymerization inhibitor

(14) DM4 is an inhibitor of tubulin polymerization

(15) Improved Fc $\gamma$ RIIIa binding and decreased affinity for human inhibitory Fc $\gamma$ RIIB (CD32B)

(16) Mutations generated in the Ig not yet reported

**Table S2.** Number of Tumor & Normal samples (N) analyzed in Figures 2B & 3B.

| Tissue                 | Normal | Tumor |
|------------------------|--------|-------|
| <i>Adipose</i>         | 72     | 10    |
| <i>Adrenal Gland</i>   | 501    | 58    |
| <i>Bladder</i>         | 65     | 16    |
| <i>Blood</i>           | 2623   | 4694  |
| <i>Bone</i>            | 14     | 5     |
| <i>Brain</i>           | 2569   | 5296  |
| <i>Breast</i>          | 567    | 9867  |
| <i>Cartilage</i>       | 2      | 51    |
| <i>Cervix</i>          | 21     | 144   |
| <i>Colon</i>           | 524    | 4887  |
| <i>Endometrium</i>     | 73     | 74    |
| <i>Esophagus</i>       | 105    | 328   |
| <i>Eye</i>             | 1      | 156   |
| <i>Gallbladder</i>     | 5      | 13    |
| <i>Head and Neck</i>   | 20     | 217   |
| <i>Heart</i>           | 41     | 222   |
| <i>Joint</i>           | 55     | 135   |
| <i>Kidney</i>          | 382    | 1534  |
| <i>Larynx</i>          | 2      | 111   |
| <i>Liver</i>           | 297    | 691   |
| <i>Lung</i>            | 1007   | 3479  |
| <i>Muscle</i>          | 684    | 5     |
| <i>Oral</i>            | 15     | 371   |
| <i>Ovary</i>           | 132    | 2121  |
| <i>Pancreas</i>        | 119    | 365   |
| <i>Pharynx</i>         | 6      | 40    |
| <i>Placenta</i>        | 17     | -     |
| <i>Prostate</i>        | 142    | 620   |
| <i>Skin</i>            | 319    | 1124  |
| <i>Small Intestine</i> | 33     | 12    |
| <i>Soft Tissue</i>     | 9      | 149   |
| <i>Stomach</i>         | 305    | 1330  |
| <i>Teeth</i>           | 8      | 27    |
| <i>Testis</i>          | 23     | 188   |
| <i>Thyroid</i>         | 199    | 379   |
| <i>Tongue</i>          | 20     | 46    |
| <i>Urothelium</i>      | 9      | 90    |
| <i>Uterus</i>          | 113    | 486   |
| <i>Vagina</i>          | 5      | 3     |
| <i>Vulva</i>           | 14     | 21    |
